# Supplementary material
Source: PubMed Central journal article supplement (PMC9188763)
Supplement: mmc1.pdf [file mmc1.pdf]

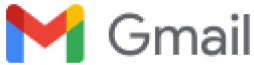

Admir Betarelli &lt;abetarelli@gmail.com&gt;

---

## B2: COVID-19, Public Agglomerations and Economic Effects: Assessing the Recovery Time of Passenger Transport Services in Brazil

---

Ashish Verma &lt;ashishv@iisc.ac.in&gt;

31 de maio de 2020 15:49

Para: Admir Betarelli &lt;abetarelli@gmail.com&gt;, rsashu74 &lt;rsashu74@gmail.com&gt;

Dear Dr. Admir

Hope you are doing well and keeping safe during the COVID-19 pandemic.

Thanks for your submission for the VSI. I have reviewed the abstract submitted by you. Your full paper fits very well into the scope of the VSI. Kindly re-submit the full paper as per the journal guidelines and make sure to run plagiarism check to ensure that similarity level is not more than 10%.

Thanking you  
Sincerely

--

\*\*\*\*\*

Ashish Verma, Ph.D.

Associate Professor, Transportation Systems Engg. (TSE)

Dept. of Civil Engg., Indian Institute of Science (IISc),

Bangalore-560012, Karnataka, India.

Phone-Office: +91-80-22932329/ 23609223/ Lab.-22932939

E-mail: [ashishv@iisc.ac.in](mailto:ashishv@iisc.ac.in), [rsashu@yahoo.com](mailto:rsashu@yahoo.com)Homepage: <http://civil.iisc.ernet.in/~ashishv/>

Office Location: Room No.103, New Annexe Building, Dept. of Civil Engg., IISc Main Campus

\*\*\*\*\*

---

**From:** Admir Betarelli <[abetarelli@gmail.com](mailto:abetarelli@gmail.com)>**Sent:** 30 May 2020 20:25**To:** rsashu74 <[rsashu74@gmail.com](mailto:rsashu74@gmail.com)>; Ashish Verma <[ashishv@iisc.ac.in](mailto:ashishv@iisc.ac.in)>**Subject:** B2: COVID-19, Public Agglomerations and Economic Effects: Assessing the Recovery Time of Passenger Transport Services in Brazil**Email from external domain: Be cautious in clicking links or in replying. --TINA, DIGITS**

[Texto das mensagens anteriores oculto]
